# Supplementary material for: Ten Years of Pathway Analysis: Current Approaches and Outstanding Challenges
Source: PubMed Central journal article supplement (PMC3285573; doi:10.1371/journal.pcbi.1002375), 2012-02-23
Supplement: pcbi.1002375.s001.pdf [file pcbi.1002375.s001.pdf]

# 10 Years of Pathway Analysis: Current Approaches and Outstanding Challenges - Supplementary Notes

Purvush Khatri<sup>1,2,\*</sup>, Marina Sirota<sup>1,2</sup>, Atul J Butte<sup>1,2,\*</sup>

1 Division of Systems Medicine, Department of Pediatrics, Stanford University School of Medicine, Stanford, CA 94305

2 Lucile Packard Children's Hospital, 725 Welch Road, Palo Alto, CA 94304

\* E-mail: pkhatri@stanford.edu, abutte@stanford.edu

## S1 Impact Factor Analysis

Impact Factor (IF) analysis [1, 2] combines both ORA and FCS approach, while accounting for the topology of the pathway. IF analysis computes Perturbation Factor (PF) for each gene in each pathway, which is a gene-level statistic, as follows:

$$PF(g_i) = \Delta F(g_i) + \sum_{j=1}^n \beta_{ji} \cdot \frac{PF(g_j)}{N_{ds}(g_j)} \quad (1)$$

In Eq. 1, the first term,  $\Delta F(g_i)$ , represents the signed normalized measured expression change (i.e., fold change) of the gene  $g_i$ . The second term in Eq. 1 accounts for the topology of the pathway, where gene  $g_j$  is upstream of gene  $g_i$ . In the second term,  $\beta_{ji}$  represents the type and strength of interaction between  $g_i$  and  $g_j$ . If  $g_j$  activates  $g_i$ ,  $\beta_{ji} = 1$ , and if  $g_j$  inhibits  $g_i$ ,  $\beta_{ji} = -1$ . Note that the PF of the upstream gene  $g_j$  is normalized by the number of downstream genes it interacts with,  $N_{ds}(g_i)$ . The second term is repeated for every gene  $g_j$  that is upstream of gene  $g_i$ .

After computing PF for each gene, pathway-level statistic, Impact Factor (IF), is computed using Eq. 2:

$$IF(P_i) = \log\left(\frac{1}{p_i}\right) + \frac{\left|\sum_{g \in P_i} PF(g)\right|}{N_{de}(P_i)} \quad (2)$$

In Eq. 2, the first term captures the significance of the given pathway  $P_i$  as provided by ORA, where  $p_i$  corresponds to the probability of obtaining a value of the statistic used at least as extreme as the one observed when the null hypothesis is true. Because IF should be large for severely impacted pathways (i.e., small p-values), the first term uses  $1/p_i$  rather than  $p_i$ . The log function is necessary to map the exponential scale of the p-values to a linear scale in order to keep the model linear. The second term sums up the values of the PFs for all genes  $g$  on the given pathway  $P_i$ , and is normalized by the number of differentially expressed genes on the given pathway  $P_i$ .

Note that Eq. 1 essentially describes the perturbation factor  $PF$  for a gene  $g_i$  as a linear function of the perturbation factors of all genes in a given pathway. Therefore, the set of all equations defining the PFs for all genes in a given pathway  $P_i$  form a system of simultaneous equations. Expanding and re-arranging Equation 1 for all genes  $g_1, g_2, \dots, g_n$  in a pathway  $P_i$  can be re-written as follows:

$$\begin{pmatrix} PF(g_1) \\ PF(g_2) \\ \dots \\ PF(g_n) \end{pmatrix} = \begin{pmatrix} 1 - \frac{\beta_{11}}{N_{ds}(g_1)} & -\frac{\beta_{21}}{N_{ds}(g_2)} & \dots & -\frac{\beta_{n1}}{N_{ds}(g_n)} \\ -\frac{\beta_{12}}{N_{ds}(g_1)} & 1 - \frac{\beta_{22}}{N_{ds}(g_2)} & \dots & -\frac{\beta_{n2}}{N_{ds}(g_n)} \\ \dots & \dots & \dots & \dots \\ -\frac{\beta_{1n}}{N_{ds}(g_1)} & -\frac{\beta_{2n}}{N_{ds}(g_2)} & \dots & 1 - \frac{\beta_{nn}}{N_{ds}(g_n)} \end{pmatrix}^{-1} \begin{pmatrix} \alpha(g_1) \cdot \Delta E(g_1) \\ \alpha(g_2) \cdot \Delta E(g_2) \\ \dots \\ \alpha(g_n) \cdot \Delta E(g_n) \end{pmatrix}$$

After computing the PFs of all genes in a given pathway as the solution of this linear system, Eq. 2 is used to calculate the impact factor of each pathway. The impact factor of each pathway is then used as

a score to assess the impact of a given gene expression data set on all pathways (the higher the impact factor the more significant the pathway).

## References

1. Draghici S, Khatri P, Tarca AL, Amin K, Done A, et al. (2007) A systems biology approach for pathway level analysis. *Genome Research* 17: 1537–1545.
2. Khatri P, Drăghici S, Tarca AL, Hassan SS, Romero R (2007) A system biology approach for the steady-state analysis of gene signaling networks. In: 12th Iberoamerican Congress on Pattern Recognition, CIARP 2007. Valparaiso, Chile.
