# Supplementary material for: Ten Years of Pathway Analysis: Current Approaches and Outstanding Challenges
Source: PubMed Central journal article supplement (PMC3285573; doi:10.1371/journal.pcbi.1002375), 2012-02-23
Supplement: pcbi.1002375.s003.pdf [file pcbi.1002375.s003.pdf]

## 10 Years of Pathway Analysis: Current Approaches and Outstanding Challenges - Supplementary Notes

Purvesh Khatri<sup>1,2,\*</sup>, Marina Sirota<sup>1,2</sup>, Atul J Butte<sup>1,2,\*</sup>

**1** Division of Systems Medicine, Department of Pediatrics, Stanford University School of Medicine, Stanford, CA 94305

**2** Lucile Packard Children's Hospital, 725 Welch Road, Palo Alto, CA 94304

\* E-mail: pkhatri@stanford.edu, abutte@stanford.edu

**Table S1. ORA pathway analysis tools.**

| Name                      | Scope of Analysis                | P-value                              | Correction for Multiple Hypotheses                   | Availability    |
|---------------------------|----------------------------------|--------------------------------------|------------------------------------------------------|-----------------|
| Onto-Express              | GO                               | Hypergeometric, binomial, chi-square | FDR, Bonferroni, Sidak, Holm                         | Web             |
| GenMAPP/<br>MAPPFinder    | GO, KEGG, MAPP                   | Percentage/z-score                   | None                                                 | Standalone      |
| (High throughput) GoMiner | GO                               | Relative enrichment, Hypergeometric  | None                                                 | Standalone, Web |
| FatiGO                    | GO, KEGG                         | Hypergeometric                       | None                                                 | Web             |
| GOstat                    | GO                               | Chi-square                           | FDR                                                  |                 |
| GOTree Machine            | GO                               | Hypergeometric                       | None                                                 | Web             |
| FuncAssociate             | GO                               | Hypergeometric                       | Bootstrap                                            | Web             |
| GOToolBox                 | GO                               | Hypergeometric                       | Bonferroni, Holm, FDR, Hommel, Hochberg              |                 |
| GeneMerge                 | GO                               | Hypergeometric                       | Bonferroni                                           | Web             |
| GOEAST                    | GO                               | Hypergeometric, Chi-square           | Benjamini-Yekutieli                                  | Web             |
| ClueGO                    | GO, KEGG, BioCarta, User defined | Hypergeometric                       | Bonferroni, step-down, Bonferroni Benjamini-Hochberg | Standalone      |
