# Supplementary material for: Ten Years of Pathway Analysis: Current Approaches and Outstanding Challenges
Source: PubMed Central journal article supplement (PMC3285573; doi:10.1371/journal.pcbi.1002375), 2012-02-23
Supplement: pcbi.1002375.s004.pdf [file pcbi.1002375.s004.pdf]

# 10 Years of Pathway Analysis: Current Approaches and Outstanding Challenges - Supplementary Notes

Purvesh Khatri<sup>1,2,\*</sup>, Marina Sirota<sup>1,2</sup>, Atul J Butte<sup>1,2,\*</sup>

1 Division of Systems Medicine, Department of Pediatrics, Stanford University School of Medicine, Stanford, CA 94305

2 Lucile Packard Children's Hospital, 725 Welch Road, Palo Alto, CA 94304

\* E-mail: pkhatri@stanford.edu, abutte@stanford.edu

Table S2. FCS pathway analysis tools.

| Name       | Scope of Analysis                                                           | Gene-level Statistic                                                                                                             | Gene Set                                                                                       | P-value                                                            | Correction for Multiple Hypotheses                                                       | Availability          |
|------------|-----------------------------------------------------------------------------|----------------------------------------------------------------------------------------------------------------------------------|------------------------------------------------------------------------------------------------|--------------------------------------------------------------------|------------------------------------------------------------------------------------------|-----------------------|
| GSEA       | GO, KEGG, BioCarta, MAPP, transcription factors, microRNA, cancer molecules | Signal-to-noise ratio, t-test, cosine, euclidian and manhattan distance, Pearson correlation, (log2) fold-change, log difference | Kolmogorov-Smirnov                                                                             | Phenotype permutation, Gene set permutation                        | FDR                                                                                      | Standalone, R package |
| sigPathway | GO, KEGG, BioCarta, humanpaths                                              | t-statistic                                                                                                                      | Wilcoxon rank sum                                                                              | Phenotype permutation, Gene set permutation                        | FDR (NPMLE)                                                                              | R package             |
| Category   | GO, KEGG                                                                    | t-statistic                                                                                                                      |                                                                                                | Phenotype permutation                                              | NA                                                                                       | R package             |
| SAFE       | GO, KEGG, PFAM                                                              | Student's t-test, Welch's t-test, SAM t-test, f-statistic, Cox proportional hazards model, linear regression                     | Wilcoxon rank sum, Fisher's exact test statistic, Pearson's test, t-test of average difference | Phenotype permutation                                              | FWER (Bonferroni, Holm's step-up), FDR (Benjamini-Hochberg, Yekutieli-Benjamini)         | R package             |
| GlobalTest | GO, KEGG                                                                    | NA                                                                                                                               | simple and multinomial logistic regression, Q-statistics                                       | Phenotype permutation, asymptotic distribution, Gamma distribution | NA                                                                                       | R package             |
| PCOT2      | User specified                                                              | Hotelling's $T^2$                                                                                                                |                                                                                                | Phenotype permutation, gene set permutation                        | FDR (Benjamini-Hochberg, Yekutieli-Benjamini), FWER (Bonferroni, Holm, Hochberg, Hommel) | R package             |
| SAM-GS     | User specified                                                              | $d$ -statistic                                                                                                                   | sum of squared $d$ -statistic                                                                  | Phenotype permutation                                              | FDR                                                                                      | Excel plug-in         |
