# Supplementary material for: Ten Years of Pathway Analysis: Current Approaches and Outstanding Challenges
Source: PubMed Central journal article supplement (PMC3285573; doi:10.1371/journal.pcbi.1002375), 2012-02-23
Supplement: pcbi.1002375.s005.pdf [file pcbi.1002375.s005.pdf]

## 10 Years of Pathway Analysis: Current Approaches and Outstanding Challenges - Supplementary Notes

Purvesh Khatri<sup>1,2,\*</sup>, Marina Sirota<sup>1,2</sup>, Atul J Butte<sup>1,2,\*</sup>

**1** Division of Systems Medicine, Department of Pediatrics, Stanford University School of Medicine, Stanford, CA 94305

**2** Lucile Packard Children's Hospital, 725 Welch Road, Palo Alto, CA 94304

\* E-mail: pkhatri@stanford.edu, abutte@stanford.edu

**Table S3. PT-based pathway analysis tools.**

| Name                 | Scope of Analysis | Gene-level statistic                                                 | statistic                | P-value                 | Correction for Multiple Hypotheses | Availability   |
|----------------------|-------------------|----------------------------------------------------------------------|--------------------------|-------------------------|------------------------------------|----------------|
| ScorePAGE            | KEGG (metabolic)  | (correlation, covariance, cosine, dot product) + Number of reactions | covariance, dot product  | Gene set permutation    | FDR (Benjamini-Hochberg)           | NA             |
| Pathway-Express/SPIA | KEGG (signaling)  | Number of fold-change                                                | and type of interactions | hypergeometric binomial | FDR                                | R package, web |
