# Supplementary material for: Ten Years of Pathway Analysis: Current Approaches and Outstanding Challenges
Source: PubMed Central journal article supplement (PMC3285573; doi:10.1371/journal.pcbi.1002375), 2012-02-23
Supplement: pcbi.1002375.s006.pdf [file pcbi.1002375.s006.pdf]

## 10 Years of Pathway Analysis: Current Approaches and Outstanding Challenges - Supplementary Notes

Purvesh Khatri<sup>1,2,\*</sup>, Marina Sirota<sup>1,2</sup>, Atul J Butte<sup>1,2,\*</sup>

**1** Division of Systems Medicine, Department of Pediatrics, Stanford University School of Medicine, Stanford, CA 94305

**2** Lucile Packard Children's Hospital, 725 Welch Road, Palo Alto, CA 94304

\* E-mail: pkhatri@stanford.edu, abutte@stanford.edu

Table S4. NCBI Entrez Gene statistics for the types of genes annotated for humans.

| Type           | Number of genes |
|----------------|-----------------|
| Protein-coding | 21,574          |
| Pseudogenes    | 14,162          |
| miscRNA        | 4,818           |
| tRNA           | 598             |
| snoRNA         | 370             |
| snRNA          | 78              |
| rRNA           | 24              |
| scRNA          | 5               |
| ncRNA          | 1               |
| Other          | 829             |
| Unknown        | 2,824           |
| <b>Total</b>   | <b>45,283</b>   |
